# Supplementary material for: The Effectiveness of a Computer-Tailored E-Learning Program for Practice Nurses to Improve Their Adherence to Smoking Cessation Counseling Guidelines: Randomized Controlled Trial
Source: PubMed Central journal article supplement (PMC5989061; doi:10.2196/jmir.9276), 2018-05-22
Supplement: jmir_v20i5e193_app1.pdf [file jmir_v20i5e193_app1.pdf]

Multimedia Appendix 1. Results of backward logistic mixed regression analyses on practice nurses' (PNs') step-based guideline adherence.

| Final model   |                                          | OR (95% CI)          | P value |
|---------------|------------------------------------------|----------------------|---------|
| <b>Step 1</b> |                                          |                      |         |
|               | Group (control=0; intervention=1)        | 1.164 (0.705-1.920)  | .55     |
|               | Baseline adherence step 1                | 1.199 (1.068-1.345)  | .002    |
| <b>Step 2</b> |                                          |                      |         |
|               | Group (control=0; intervention=1)        | 1.004 (0.652-1.545)  | .99     |
|               | Perceived advantages                     | 2.658 (1.593-4.437)  | .000    |
|               | Group <sup>a*</sup> perceived advantages | 0.298 (0.143-0.621)  | .001    |
| <b>Step 3</b> |                                          |                      |         |
|               | Group (control =0; intervention=1)       | 2.042 (1.065-3.918)  | .03     |
|               | Self-efficacy                            | 1.597 (0.813-3.139)  | .17     |
|               | Group * self-efficacy                    | 0.288 (0.097-0.851)  | .02     |
| <b>Step 4</b> |                                          |                      |         |
|               | Group (control=0; intervention=1)        | 1.347 (0.846-2.144)  | .21     |
|               | Counseling experience                    | 0.946 (0.863-1.037)  | .24     |
|               | Baseline adherence step 4                | 1.148 (1.032-1.277)  | .01     |
|               | Perceived advantages                     | 1.548 (1.038-2.308)  | .03     |
|               | Group * counseling experience            | 1.135 (0.995-1.293)  | .06     |
| <b>Step 5</b> |                                          |                      |         |
|               | Group (control=0; intervention=1)        | 1.294 (0.717-2.336)  | .39     |
|               | Intention to use STIMEDIC                | 1.289 (0.985-1.687)  | .06     |
|               | Social modeling                          | 2.058 (0.995-4.255)  | .05     |
|               | Social support                           | 0.571 (0.247-1.320)  | .19     |
|               | Group * social modeling                  | 0.259 (0.095-0.710)  | .009    |
|               | Group * social support                   | 3.094 (1.019-9.387)  | .046    |
| <b>Step 6</b> |                                          |                      |         |
|               | Group (control=0; intervention=1)        | 1.175 (0.710-1.947)  | .53     |
|               | Perceived advantages                     | 1.550 (1.010-2.377)  | .045    |
| <b>Step 7</b> |                                          |                      |         |
|               | Group (control=0; intervention=1)        | 0.854 (0.435-1.675)  | .65     |
|               | Counseling experience                    | 0.891 (0.891-1.001)  | .05     |
|               | Perceived disadvantages                  | 2.162 (0.792-5.900)  | .13     |
|               | Self-efficacy                            | 4.353 (1.628-11.638) | .003    |
|               | Social modeling                          | 1.654 (1.118-2.446)  | .01     |
|               | Group * counseling                       | 1.184 (0.997-1.406)  | .05     |
