# Supplementary material for: The Effectiveness of a Computer-Tailored E-Learning Program for Practice Nurses to Improve Their Adherence to Smoking Cessation Counseling Guidelines: Randomized Controlled Trial
Source: PubMed Central journal article supplement (PMC5989061; doi:10.2196/jmir.9276), 2018-05-22
Supplement: jmir_v20i5e193_app3.pdf [file jmir_v20i5e193_app3.pdf]

Multimedia Appendix 3. Correlation matrix of practice nurse (PN) characteristics

|                                                  | 1   | 2   | 3           | 4           | 5           | 6           | 7           | 8           | 9           | 10          | 11          | 12          | 13          |
|--------------------------------------------------|-----|-----|-------------|-------------|-------------|-------------|-------------|-------------|-------------|-------------|-------------|-------------|-------------|
| 1. Working hours                                 | 1.0 | .06 | .07         | <i>-.02</i> | <i>-.03</i> | <i>-.02</i> | <i>-.03</i> | <i>-.01</i> | .10         | <i>-.06</i> | <i>-.02</i> | <i>-.00</i> | .10         |
| 2. Counseling experience                         | 0   | 1.0 | <i>-.02</i> | .00         | .08         | <i>-.01</i> | <i>-.10</i> | .03         | <i>-.02</i> | <i>-.05</i> | <i>-.07</i> | .02         | .16         |
| 3. Designated consulting-hours                   |     | 0   | 1.0         | .01         | <i>-.03</i> | .09         | .10         | <i>-.03</i> | .07         | .13         | .09         | .07         | .10         |
| 4. Intention to use any evidence-based guideline |     |     | 0           | 1.0         | .41         | <i>-.00</i> | .33         | <i>-.39</i> | .12         | .31         | .29         | .31         | .12         |
| 5. Intention to use STIMEDIC®                    |     |     |             | 0           | 1.0         | .07         | .23         | <i>-.17</i> | .11         | .18         | .13         | .16         | .04         |
| 6. STIMEDIC® knowledge                           |     |     |             |             | 0           | 1.0         | .10         | <i>-.08</i> | .01         | <i>-.01</i> | .05         | .06         | <i>-.05</i> |
| 7. Perceived advantages                          |     |     |             |             |             | 0           | 1.0         | .40         | .11         | .29         | .34         | .40         | <i>-.00</i> |
| 8. Perceived disadvantages                       |     |     |             |             |             |             | 0           | 1.0         | <i>-.30</i> | <i>-.30</i> | <i>-.33</i> | <i>-.33</i> | <i>-.17</i> |
| 9. Self-efficacy                                 |     |     |             |             |             |             |             | 0           | 1.0         | .16         | .17         | .17         | .14         |
| 10. Social modelling                             |     |     |             |             |             |             |             |             | 0           | 1.0         | .71         | .69         | .16         |
| 11. Social support                               |     |     |             |             |             |             |             |             |             | 0           | 1.0         | .88         | .20         |
| 12. Social norms                                 |     |     |             |             |             |             |             |             |             |             | 0           | 1.0         | .21         |
| 13. Baseline guideline adherence                 |     |     |             |             |             |             |             |             |             |             |             | 0           | 1.0         |

Note: Data in *italics* denote a significant correlation.
