# Supplementary material for: The Effectiveness of a Computer-Tailored E-Learning Program for Practice Nurses to Improve Their Adherence to Smoking Cessation Counseling Guidelines: Randomized Controlled Trial
Source: J Med Internet Res. 2018 May 22;20(5):e193. doi: 10.2196/jmir.9276 (PMC5989061; doi:10.2196/jmir.9276)
Supplement: Multimedia Appendix 2 [file jmir_v20i5e193_app2.pdf]

Multimedia Appendix 2. Odds ratios (95% CI) reflecting intervention effects of subgroup analyses of significant interaction effects per guideline step with Holm-Bonferroni corrected p-values

| Guideline step                   | Effect of Group (0 = control group, 1 = intervention group) for each of the subgroups |                       |                             |                      |                           |                       |       |
|----------------------------------|---------------------------------------------------------------------------------------|-----------------------|-----------------------------|----------------------|---------------------------|-----------------------|-------|
|                                  | P                                                                                     |                       | P                           |                      | P                         |                       |       |
| Step 2 smoking profile & history | Low perceived advantages                                                              |                       | Medium perceived advantages |                      | High perceived advantages |                       |       |
|                                  | 2.084 (1.141-3.809)                                                                   | .05                   | 1.004 (0.652-1.545)         | .99                  | 0.484 (0.257-0.911)       | .049*                 |       |
| Step 3 assessing motivation      | Low self- efficacy                                                                    |                       | Medium self-efficacy        |                      | High self-efficacy        |                       |       |
|                                  | 4.441 (1.689-11.678)                                                                  | .01*                  | 2.042 (1.065-3.918)         | .06                  | 0.939 (0.378-2.332)       | .89                   |       |
| Step 4 increasing motivation     | Low experience                                                                        |                       | Medium experience           |                      | High experience           |                       |       |
|                                  | 0.841 (0.437-1.620)                                                                   | .61                   | 1.347 (0.846-2.144)         | .42                  | 2.157 (1.080-4.306)       | .09                   |       |
| Step 5 assessing barriers        | Low social support                                                                    |                       | Medium social support       |                      | High social support       |                       |       |
|                                  | <u>low social modelling</u>                                                           | 1.767 (0.753-4.145)   | .38                         | 4.220 (1.407-12.657) | .045*                     | 10.085 (1.708-59.442) | .04*  |
|                                  | <u>medium social modelling</u>                                                        | 0.542 (0.200-1.467)   | .34                         | 1.294 (0.717-2.336)  | .39                       | 3.089 (1.047-9.114)   | .12   |
|                                  | <u>high social modelling</u>                                                          | 0.166 (0.031-0.889)   | .13                         | 0.397 (0.143-1.104)  | .19                       | 0.947 (0.399-2.247)   | .90   |
| Step 7 cessation aids            | Low self-efficacy                                                                     |                       | Medium self-efficacy        |                      | High self-efficacy        |                       |       |
|                                  | <u>low counseling experience</u>                                                      |                       |                             |                      |                           |                       |       |
|                                  | + low perceived disadvantages                                                         | 4.402 (1.098-17.643)  | .19                         | 1.106 (0.372-3.291)  | .86                       | 0.278 (0.073-1.053)   | .28   |
|                                  | + medium perceived disadvantages                                                      | 1.811 (0.586-5.601)   | .81                         | 0.455 (0.175-1.187)  | .43                       | 0.114 (0.029-0.452)   | .02*  |
|                                  | + high perceived disadvantages                                                        | 0.745 (0.210-2.644)   | .65                         | 0.187 (0.052-0.672)  | .07                       | 0.047 (0.008-0.265)   | .005* |
|                                  | <u>medium counseling experience</u>                                                   |                       |                             |                      |                           |                       |       |
|                                  | + low perceived disadvantages                                                         | 8.257 (2.297-29.677)  | .01*                        | 2.075 (0.814-5.292)  | .46                       | 0.522 (0.157-1.731)   | .86   |
|                                  | + medium perceived disadvantages                                                      | 3.398 (1.366-8.451)   | .06                         | 0.854 (0.435-1.675)  | .86                       | 0.215 (0.066-0.701)   | .07   |
|                                  | + high perceived disadvantages                                                        | 1.398 (0.513-3.811)   | .86                         | 0.351 (0.128-0.961)  | .21                       | 0.088 (0.019-0.408)   | .02*  |
|                                  | <u>high counseling experience</u>                                                     |                       |                             |                      |                           |                       |       |
|                                  | + low perceived disadvantages                                                         | 15.493 (3.558-67.472) | .003*                       | 3.894 (1.201-12.624) | .14                       | 0.979 (0.244-3.920)   | .98   |
|                                  | + medium perceived disadvantages                                                      | 6.375 (2.127-19.108)  | .01*                        | 1.602 (0.652-3.935)  | .71                       | 0.403 (0.108-1.502)   | .58   |
|                                  | + high perceived disadvantages                                                        | 2.623 (0.867-7.940)   | .38                         | 0.659 (0.219-1.983)  | .92                       | 0.166 (0.034-0.811)   | .15   |

Note: for steps 5, 7 and 8 subgroup analyses are conducted concerning multiple moderators. Consequently, two (i.e. step 5) or three moderators (i.e. steps 7 and 8) are used to define 9 resp. 27 subgroups. Low subgroup: score at Mean - 1 SD; Medium subgroup: score at Mean; High subgroup: score at Mean + 1 SD

Multimedia Appendix 2 (continued). Odds ratios (95% CI) reflecting intervention effects of subgroup analyses of significant interaction effects per guideline step with Holm-Bonferroni corrected p-values

| Guideline step                      | Effect of Group (0 = control group, 1 = intervention group) for each of the subgroups |       |                        |       |                      |       |
|-------------------------------------|---------------------------------------------------------------------------------------|-------|------------------------|-------|----------------------|-------|
|                                     | P                                                                                     |       | P                      |       | P                    |       |
|                                     | Low social norms                                                                      |       | Medium social norms    |       | High social norms    |       |
| Step 8 quit plan & quit date        |                                                                                       |       |                        |       |                      |       |
| <u>low counseling experience</u>    |                                                                                       |       |                        |       |                      |       |
| + low social support                | 0.166 (0.034-0.811)                                                                   | .10   | 0.137 (0.042-0.447)    | .007* | 0.027 (0.003-0.221)  | .006* |
| + medium social support             | 4.266 (0.977-18.619)                                                                  | .11   | 0.854 (0.411-1.773)    | .67   | 0.171 (0.051-0.568)  | .02*  |
| + high social support               | 26.532 (2.517-279.675)                                                                | .03*  | 5.309 (1.354-20.826)   | .07   | 1.062 (0.451-2.502)  | .89   |
| <u>medium counseling experience</u> |                                                                                       |       |                        |       |                      |       |
| + low social support                | 1.418 (0.588-3.418)                                                                   | .60   | 0.284 (0.109-0.742)    | .047* | 0.057 (0.008-0.380)  | .02*  |
| + medium social support             | 8.821 (1.987-39.151)                                                                  | .02*  | 1.765 (0.996-3.129)    | .12   | 0.353 (0.131-0.950)  | .12   |
| + high social support               | 54.860 (5.872-617.728)                                                                | .007* | 10.978 (2.740-43.987)  | .006* | 2.197 (1.057-4.567)  | .15   |
| <u>high counseling experience</u>   |                                                                                       |       |                        |       |                      |       |
| + low social support                | 2.934 (0.996-8.643)                                                                   | .14   | 0.587 (0.210-1.644)    | .52   | 0.117 (0.018-0.762)  | .10   |
| + medium social support             | 18.245 (3.342-99.594)                                                                 | .006* | 3.651 (1.553-8.582)    | .02*  | 0.731 (0.253-2.110)  | .56   |
| + high social support               | 113.476 (8.384-1,535.862)                                                             | .003* | 22.707 (4.535-113.692) | .001* | 4.544 (1.717-12.024) | .01*  |
| Step 9 follow-up                    |                                                                                       |       |                        |       |                      |       |
|                                     | Low social support                                                                    |       | Medium social support  |       | High social support  |       |
|                                     | 0.708 (0.383-1.309)                                                                   | .54   | 1.121 (0.735-1.711)    | .59   | 1.777 (0.976-3.234)  | .18   |

Note: for steps 5, 7 and 8 subgroup analyses are conducted concerning multiple moderators. Consequently, two (i.e. step 5) or three moderators (i.e. steps 7 and 8) are used to define 9 resp. 27 subgroups. Low subgroup: score at Mean - 1 SD; Medium subgroup: score at Mean; High subgroup: score at Mean + 1 SD
